# Supplementary material for: Epidemiology of at-risk alcohol use and associated comorbidities of interest among community-dwelling older adults: a protocol for a systematic review
Source: PubMed Central journal article supplement — BMJ Open. 2020 Jan 9;10(1):e035481. doi: 10.1136/bmjopen-2019-035481 (PMC6955484; doi:10.1136/bmjopen-2019-035481), 2020-01-09
Supplement: bmjopen-2019-035481supp002.pdf [file bmjopen-2019-035481supp002.pdf]

## Epidemiology of at risk alcohol use and associated comorbidities of interest among home dwelling older and very old adults: a systematic review

Document de travail\_V8\_02.09.2019

|                                                                                                                                                                                                                            |                                                                                                                 |  |
|----------------------------------------------------------------------------------------------------------------------------------------------------------------------------------------------------------------------------|-----------------------------------------------------------------------------------------------------------------|--|
| <b>Recherche effectuée par</b> Joëlle ROSSELET AMOUSSOU, Psychiatry library, Education and Research Department, Lausanne University Hospital and University of Lausanne, Site de Cery, 1008 Prilly, Lausanne, Switzerland. | <b>à l'attention de</b> Maria LATANIOTI, Equipe mobile de la personne âgée, Département de psychiatrie du CHUV. |  |
| <b>Recherche révisée par</b> Cécile Jaques et Jolanda Elmers, Medical Library, Education and Research Department, Lausanne University Hospital and University of Lausanne, Switzerland.                                    | le 30 août 2019                                                                                                 |  |
| <b>Finalité(s) de la recherche</b>                                                                                                                                                                                         | Revue systématique                                                                                              |  |

|                                                                   |           |
|-------------------------------------------------------------------|-----------|
| <b>Question de recherche</b> .....                                | <b>2</b>  |
| <b>1. Articles d'intérêt (Protocole_version_05.07.2019)</b> ..... | <b>2</b>  |
| <b>2. Recherche préliminaire de revues systématiques</b> .....    | <b>2</b>  |
| <i>Embase.com</i> .....                                           | 2         |
| <i>Epistomonikos</i> .....                                        | 2         |
| <i>Cochrane Library Wiley</i> .....                               | 3         |
| <i>Prospero</i> .....                                             | 3         |
| <b>3. Sources de données exploitées</b> .....                     | <b>3</b>  |
| <b>4. Vocabulaire</b> .....                                       | <b>4</b>  |
| <b>5. Stratégies de recherche pour les bases de données</b> ..... | <b>7</b>  |
| <i>Embase.com</i> .....                                           | 7         |
| <i>Medline Ovid SP</i> .....                                      | 8         |
| <i>PubMed</i> .....                                               | 8         |
| <i>CINAHL EBSCO</i> .....                                         | 9         |
| <i>PsycINFO Ovid SP</i> .....                                     | 10        |
| <i>Central - Cochrane Library Wiley</i> .....                     | 11        |
| <i>Web of Science – Core collection</i> .....                     | 12        |
| <b>6. Résultats</b> .....                                         | <b>12</b> |

## Question de recherche

|                                                   |                                                                                                                            |
|---------------------------------------------------|----------------------------------------------------------------------------------------------------------------------------|
| <b>Question originale</b><br>(formulaire demande) | Epidemiology of at risk alcohol use and associated comorbidities of interest among home dwelling older and very old adults |
|---------------------------------------------------|----------------------------------------------------------------------------------------------------------------------------|

## 1. Articles d'intérêt (Protocole\_version\_05.07.2019)

|        |                                                                                                                                                                                                                                                                                                                                                                                               |
|--------|-----------------------------------------------------------------------------------------------------------------------------------------------------------------------------------------------------------------------------------------------------------------------------------------------------------------------------------------------------------------------------------------------|
| PubMed | 16021662[uid] OR 9741947[uid] OR 10894315[uid] OR 17302657[uid] OR 8751316[uid] OR 14500441[uid] OR 7025691[uid] OR 11910708[uid] OR 19131359[uid] OR 12271880[uid] OR 15897727[uid] OR 28879547[uid] OR 11001132[uid] OR 14960434[uid] OR 26297937[uid] OR 9195283[uid] OR 8832344[uid] OR 10404931[uid] OR 27658235[uid] OR 17606817[uid] OR 15201626[uid] OR 12366628[uid] OR 8120683[uid] |
|--------|-----------------------------------------------------------------------------------------------------------------------------------------------------------------------------------------------------------------------------------------------------------------------------------------------------------------------------------------------------------------------------------------------|

## 2. Recherche préliminaire de revues systématiques

### Embase.com

Stratégie avec syntaxe adaptée à copier/coller dans base de donnée [ici](#)

('aged'/de OR 'very elderly'/exp OR (elder\* OR eldest OR geriatri\* OR "old age\*" OR "oldest old\*" OR senior\* OR senium OR "very old\*" OR septuagenarian\* OR octagenarian\* OR octogenarian\* OR nonagenarian\* OR centarian\* OR centenarian\* OR supercentenarian\* OR ((old OR older) NEXT/1 (patient\* OR people OR subject\* OR age\* OR adult\* OR man OR men OR male\* OR woman OR women OR female\* OR population\* OR person\*)) OR (aged NEXT/1 (patient OR people OR person OR subject))):ab,ti) AND ('alcoholism'/exp OR 'drinking behavior'/exp OR 'alcohol consumption'/exp OR 'alcohol abuse'/exp OR 'alcohol intoxication'/exp OR (alcohol\* OR drink\* OR drunk\* OR ethanol):ab,ti) AND ('community care'/exp OR 'ambulatory care'/exp OR 'outpatient'/exp OR 'outpatient department'/exp OR 'day care'/exp OR 'primary health care'/exp OR 'health center'/exp OR 'home care'/exp OR (home OR homecare OR home-care OR home-based OR homebound OR home-bound OR "living alone" OR domiciliary OR "day patient\*" OR community OR "preventive health" OR "preventive service" OR ambulatory OR outpatient\* OR "out patient\*" OR out-patient\* OR (day NEXT/1 (clinic OR hospital)) OR daycare OR (day NEXT/1 (care OR center)) OR (primary NEXT/3 (care OR healthcare)) OR "first line care" OR "health center\*" OR domestic):ab,ti) AND ((cochrane review)/lim OR [systematic review]/lim OR [meta analysis]/lim)

|                         |                                                                                        |                         |
|-------------------------|----------------------------------------------------------------------------------------|-------------------------|
| <a href="#">93</a>      | <b>références trouvées le</b>                                                          | <b>2 septembre 2019</b> |
| <b>Commentaire(s) :</b> | Filtre EBM : ((cochrane review)/lim OR [systematic review]/lim OR [meta analysis]/lim) |                         |

### Epistomonikos

Stratégie avec syntaxe adaptée à copier/coller dans base de donnée [ici](#)

(alcohol\* OR drink\*) AND (elder\* OR geriatri\* OR aged OR old OR ageing)

|                         |                                             |                         |
|-------------------------|---------------------------------------------|-------------------------|
| <a href="#">9</a>       | <b>références trouvées le</b>               | <b>2 septembre 2019</b> |
| <b>Commentaire(s) :</b> | Filtre Publication type : Systematic Review |                         |

### Cochrane Library Wiley

Stratégie avec syntaxe adaptée à copier/coller dans base de donnée [ici](#)

(alcohol\* OR drink\*) AND (elder\* OR geriatri\* OR aged OR old OR ageing)

(alcohol\* OR drink\* OR drunk\* OR ethanol) AND (incidence OR prevalence OR epidemiolog\* OR morbidit\*)

|                   |                        |                  |
|-------------------|------------------------|------------------|
| <a href="#">1</a> | références trouvées le | 2 septembre 2019 |
| Commentaire(s) :  |                        |                  |

### Prospero

Stratégie avec syntaxe adaptée à copier/coller dans base de donnée [ici](#)

((alcohol\* OR dirnk\*) AND (elder\* OR geriatri\* OR aged OR old OR ageing)):TI AND (Epidemiologic OR Systematic Review OR Meta-Analysis OR PMA OR Review of Reviews):RT

|                                                                                             |                        |                  |
|---------------------------------------------------------------------------------------------|------------------------|------------------|
| <a href="#">5</a>                                                                           | références trouvées le | 2 septembre 2019 |
| Commentaire(s) :                                                                            |                        |                  |
| Filtre (Epidemiologic OR Systematic Review OR Meta-Analysis OR PMA OR Review of Reviews):RT |                        |                  |

### 3. Sources de données exploitées

Embase.com

Medline Ovid SP

PubMed

CINAHL EBSCO

PsycINFO Ovid SP

CENTRAL - Cochrane Library Wiley

Web of Science – Core collection

## 4. Vocabulaire

| Concepts choisis                 | Aged                                                                                                                                                                                                                                             | Alcohol                                                                                                                                                                                                             | Comorbidity                                                                                                                                                                                                                                                                                                                                                                                                                                                                                                                                                                                                                                                                                                                                                                                                                                                                                                                                                                                                            | Epidemiology + Study designs reporting prevalence and incidence data                                                                                                                                                                                                                                                                                                                                           |
|----------------------------------|--------------------------------------------------------------------------------------------------------------------------------------------------------------------------------------------------------------------------------------------------|---------------------------------------------------------------------------------------------------------------------------------------------------------------------------------------------------------------------|------------------------------------------------------------------------------------------------------------------------------------------------------------------------------------------------------------------------------------------------------------------------------------------------------------------------------------------------------------------------------------------------------------------------------------------------------------------------------------------------------------------------------------------------------------------------------------------------------------------------------------------------------------------------------------------------------------------------------------------------------------------------------------------------------------------------------------------------------------------------------------------------------------------------------------------------------------------------------------------------------------------------|----------------------------------------------------------------------------------------------------------------------------------------------------------------------------------------------------------------------------------------------------------------------------------------------------------------------------------------------------------------------------------------------------------------|
| Mots libres<br>Syntaxe<br>Embase | elder* OR eldest OR geriatr* OR "old aged" OR "oldest old*" OR "very old*" OR (older NEXT/1 (patient* OR people OR subject* OR age* OR adult* OR man OR men OR male* OR woman OR women OR female* OR population* OR person*)) OR aging OR ageing | (alcohol* OR drunk*):ab,ti,kw OR (drink*):ab,ti,kw NOT ('dysphagia'/exp OR 'drinking'/exp OR 'drinking water'/exp OR 'fluid intake'/de OR (deglutition-disorder* OR dysphagia* OR (water NEAR/1 drink*)):ab,ti,kw)) | (comorbid* OR comorbid* OR co-occurr* OR coocurr* OR ((disease* OR sickness*) NEAR/2 associat*)):ab,ti,kw OR (hypertension OR "blood pressure*" OR hypertensive):ab,ti,kw OR ("mood disorder*" OR depression* OR bipolar OR depressive OR dysthymia OR melancholia OR melancholy OR mourning OR ((dysthymic OR affective OR cyclothymic) NEXT/3 disorder*)):ab,ti,kw OR (pain OR pains OR "physical suffering*" OR ache OR aches):ab,ti,kw OR (liver OR hepatic OR hepatit* OR hepatitis OR hepatopathy OR cirrhosis):ab,ti,kw OR ((sleep NEAR/3 (disorder* OR disturbance* OR dysfunction*)) OR dyssomnia* OR insomnia* OR sleepless*):ab,ti,kw OR (((cognition OR neurocognitive OR consciousness) NEXT/3 disorder*) OR (cognitive NEXT/3 (defect* OR deficit* OR disab* OR disorder* OR dysfunction* OR impairment*)) OR dementia OR "executive dysfunction*" OR amnesia OR korsakoff OR huntington OR delirium OR alzheimer OR "creutzfeldt jakob" OR "kluever bucy" OR "lewy body" OR "lewy bodies" OR "alcoholic | epidemiol* OR prevalen* OR inciden* OR morbidity OR "general population" OR "population based" OR surveillance OR cohort OR "case-control stud*" OR ("cross sectional" NEXT/3 (study OR studies OR design OR research)) OR "follow-up stud*" OR "followup stud*" OR "longitudinal stud*" OR "longitudinal evaluation" OR (retrospective NEXT/3 (study OR studies OR design)) OR survey OR surveys OR screening |

|               |                                                                                                                                                  |                                                                                                                                                                                           |                                                                                                                                                                                                                                                                                                                                                                                                                                                                 |                                                                                                                                                                                                                                                                                                                                                                                                                                                                             |
|---------------|--------------------------------------------------------------------------------------------------------------------------------------------------|-------------------------------------------------------------------------------------------------------------------------------------------------------------------------------------------|-----------------------------------------------------------------------------------------------------------------------------------------------------------------------------------------------------------------------------------------------------------------------------------------------------------------------------------------------------------------------------------------------------------------------------------------------------------------|-----------------------------------------------------------------------------------------------------------------------------------------------------------------------------------------------------------------------------------------------------------------------------------------------------------------------------------------------------------------------------------------------------------------------------------------------------------------------------|
|               |                                                                                                                                                  |                                                                                                                                                                                           | psychosis" OR "toxic psychoses" OR "amyotrophic lateral sclerosis" OR "corticobasal degeneration" OR "multiple system atroph*" OR parkinson*):ab,ti,kw OR (diabetes OR diabetic* OR prediabetic* OR "glucose intolerance*"):ab,ti,kw OR (anxiety OR "acute stress disorder*" OR "distress syndrome*" OR "obsessive compulsive" OR panic OR phobia* OR "phobic disorder*" OR "posttraumatic stress" OR "post-traumatic stress" OR "neurotic disorder*"):ab,ti,kw |                                                                                                                                                                                                                                                                                                                                                                                                                                                                             |
| <b>Emtree</b> | 'aged'/de OR 'frail elderly'/de OR 'very elderly'/exp OR 'elderly care'/de OR 'geriatric care'/exp OR 'geriatric patient'/de OR 'geriatrics'/exp | 'alcoholism'/exp OR 'drinking behavior'/exp OR 'alcohol consumption'/exp OR 'alcohol abuse'/exp<br><br>NOT 'dysphagia'/exp OR 'drinking'/exp OR 'drinking water'/exp OR 'fluid intake'/de | 'comorbidity'/de OR 'comorbidity assessment'/exp OR 'disease association'/de OR 'hypertension'/exp OR 'mood disorder'/exp OR 'pain'/exp OR 'liver disease'/exp OR 'sleep disorder'/exp OR 'insomnia'/exp OR 'cognitive defect'/exp OR 'diabetes mellitus'/exp OR 'anxiety disorder'/exp                                                                                                                                                                         | 'epidemiology'/de OR 'epidemiology'/lnk OR 'health survey'/exp OR 'incidence'/de OR 'prevalence'/de OR 'morbidity'/de OR 'population'/exp OR 'population research'/de OR 'population risk'/de OR 'population statistics'/exp OR 'screening'/de OR 'mass screening'/de OR 'cohort analysis'/de OR 'case control study'/de OR 'population based case control study'/de OR 'cross-sectional study'/de OR 'follow up'/de OR 'longitudinal study'/de OR 'retrospective study'/de |
| <b>MeSH</b>   | exp Aged/ OR "Geriatric Nursing"/ OR "Geriatric Assessment"/ OR "Geriatrics"/ OR "Geriatric Psychiatry"                                          | alcoholism/ OR drinking behavior/ OR binge drinking/ OR alcohol drinking/<br><br>NOT exp "Deglutition Disorders"/ OR "Drinking"/ OR "Drinking Water"                                      | "Comorbidity"/ OR exp "Hypertension"/ OR exp "Mood Disorders"/ OR exp "Pain"/ OR exp "Liver Diseases"/ OR exp "Sleep Wake Disorders"/ OR exp "Cognition Disorders"/ OR "Cognitive Dysfunction"/ OR exp "Dementia"/ OR exp "Diabetes Mellitus"/ OR exp "Anxiety Disorders"/                                                                                                                                                                                      | "Epidemiology"/ OR exp "Epidemiologic Methods"/ OR "epidemiology".fs. OR "Incidence"/ OR "Prevalence"/ OR "Morbidity"/ OR "Health Surveys"/ OR exp "Population Surveillance"/ OR "Epidemiologic Measurements"/ OR exp "Population"/ OR exp "Epidemiologic Methods"/ OR "Mass                                                                                                                                                                                                |

|                 |                                                                                                                                                                                               |                                                                                                                                                                                                                           |                                                                                                                                                                                                                                                                                |                                                                                                                                                                                                                                                                                                                                                                                                                                               |
|-----------------|-----------------------------------------------------------------------------------------------------------------------------------------------------------------------------------------------|---------------------------------------------------------------------------------------------------------------------------------------------------------------------------------------------------------------------------|--------------------------------------------------------------------------------------------------------------------------------------------------------------------------------------------------------------------------------------------------------------------------------|-----------------------------------------------------------------------------------------------------------------------------------------------------------------------------------------------------------------------------------------------------------------------------------------------------------------------------------------------------------------------------------------------------------------------------------------------|
|                 |                                                                                                                                                                                               |                                                                                                                                                                                                                           |                                                                                                                                                                                                                                                                                | Screening"/ OR exp<br>"Epidemiologic<br>Studies"/                                                                                                                                                                                                                                                                                                                                                                                             |
| <b>CINAHL</b>   | MH "Aged" OR MH<br>"Aged, 80 and Over" OR<br>MH "Frail Elderly" OR<br>MH "Gerontologic<br>Nursing+" OR MH<br>"Geriatric<br>Assessment+" OR MH<br>"Geriatrics" OR MH<br>"Geriatric Psychiatry" | MH "Alcoholism" OR<br>MH "Alcohol Abuse+"<br>OR MH "Drinking<br>Behavior+" OR MH<br>"Alcohol Drinking" OR<br>MH "Binge Drinking"<br><br>NOT MH "Deglutition<br>Disorders" OR MH<br>"Water Supply" OR MH<br>"Fluid Intake" | MH "Comorbidity" OR<br>MH "Hypertension+"<br>OR MH "Affective<br>Disorders+" OR MH<br>"Pain+" OR MH "Liver<br>Diseases+" OR MH<br>"Sleep Disorders+" OR<br>MH "Cognition<br>Disorders+" OR MH<br>"Dementia+" OR MH<br>"Diabetes Mellitus+" OR<br>MH "Anxiety<br>Disorders+"    | MH "Epidemiology+"<br>OR MW epidemiology<br>OR MH "Incidence" OR<br>MH "Prevalence" OR<br>MH "Morbidity" OR MH<br>"Epidemiological<br>Research" OR MH<br>"Population" OR MH<br>"Rural Population" OR<br>MH "Suburban<br>Population" OR MH<br>"Urban Population" OR<br>MH "Health Screening"<br>OR MH "Prospective<br>Studies+" OR MH "Case<br>Control Studies" OR MH<br>"Population-Based Case<br>Control" OR MH "Cross<br>Sectional Studies" |
| <b>PsycINFO</b> | geriatrics/ OR geriatric<br>assessment/ OR<br>geriatric patients/ OR<br>geriatric psychiatry/ OR<br>elder care/ OR aging in<br>place/                                                         | exp alcohol abuse/ OR<br>drinking behavior/ OR<br>alcohol drinking<br>patterns/<br><br>NOT dysphagia/ OR exp<br>fluid intake/                                                                                             | comorbidity/ OR exp<br>hypertension/ OR exp<br>affective disorders/ OR<br>exp pain/ OR pain<br>measurement/ OR exp<br>liver disorders/ OR exp<br>sleep disorders/ OR<br>cognitive impairment/<br>OR exp dementia/ OR<br>exp diabetes mellitus/<br>OR exp anxiety<br>disorders/ | epidemiology/ OR exp<br>population/ OR<br>screening/ OR health<br>screening/ OR cohort<br>analysis/ OR followup<br>studies/ OR exp<br>longitudinal studies/ OR<br>retrospective studies/                                                                                                                                                                                                                                                      |

**Concept Alcohol**

Pour enlever du bruit avec "drink\*" en terme libre, nous avons exclu les références associées à "dysphagia", "drinking water", etc.

Exemple avec la syntaxe de la base de données Embase.com :

drink\*:ab,ti,kw NOT ('dysphagia'/exp OR 'drinking'/exp OR 'drinking water'/exp OR 'fluid intake'/de OR (deglutition-disorder\* OR dysphagia\* OR (water NEAR/1 drink\*)):ab,ti,kw

**Concept Epidemiology**

Pour construire notre concept nous avons combiné les termes libres et les vedettes matières associées à l'épidémiologie, avec les types d'études pouvant nous apporter des données épidémiologiques.

Les articles de (Waffenschmidt, 2017) et (Workneh, 2017) nous ont inspiré pour l'élaboration de ce concept :

Waffenschmidt S, Hermanns T, Gerber-Grote A, Mostardt S. No suitable precise or optimized epidemiologic search filters were available for bibliographic databases. *J Clin Epidemiol*. 2017 Feb;82:112-118. doi: 10.1016/j.jclinepi.2016.08.008. Epub 2016 Aug 26. PubMed [PMID: 27570049](https://pubmed.ncbi.nlm.nih.gov/27570049/).

Workneh MH, Bjune GA, Yimer SA. Prevalence and associated factors of tuberculosis and diabetes mellitus comorbidity: A systematic review. PLoS One. 2017 Apr 21;12(4):e0175925. doi: 10.1371/journal.pone.0175925. eCollection 2017. Review. PubMed PMID: 28430796.

## 5. Stratégies de recherche pour les bases de données

### Embase.com

Stratégie avec syntaxe adaptée à copier/coller dans base de donnée [ici](#)

('aged'/de OR 'frail elderly'/de OR 'very elderly'/exp OR 'elderly care'/de OR 'geriatric care'/exp OR 'geriatric patient'/de OR 'geriatrics'/exp OR (elder\* OR eldest OR geriatr\* OR "old aged" OR "oldest old\*" OR "very old\*" OR (older NEXT/1 (patient\* OR people OR subject\* OR age\* OR adult\* OR man OR men OR male\* OR woman OR women OR female\* OR population\* OR person\*)) OR aging OR ageing):ab,ti,kw) AND ('alcoholism'/exp OR 'drinking behavior'/exp OR 'alcohol consumption'/exp OR 'alcohol abuse'/exp OR (alcohol\* OR drunk\*):ab,ti,kw OR (drink\*:ab,ti,kw NOT ('dysphagia'/exp OR 'drinking'/exp OR 'drinking water'/exp OR 'fluid intake'/de OR (deglutition-disorder\* OR dysphagia\* OR (water NEAR/1 drink\*):ab,ti,kw))) AND ('comorbidity'/de OR 'comorbidity assessment'/exp OR 'disease association'/de OR (comorbid\* OR co-morbid\* OR co-occurr\* OR cooccurr\* OR ((disease\* OR sickness\*) NEAR/2 associat\*):ab,ti,kw OR 'hypertension'/exp OR (hypertension OR "blood pressure\*" OR hypertensive):ab,ti,kw OR 'mood disorder'/exp OR ("mood disorder\*" OR depression\* OR bipolar OR depressive OR dysthymia OR melancholia OR melancholy OR mourning OR ((dysthymic OR affective OR cyclothymic) NEXT/3 disorder\*):ab,ti,kw OR 'pain'/exp OR (pain OR pains OR "physical suffering\*" OR ache OR aches):ab,ti,kw OR 'liver disease'/exp OR (liver OR hepatic OR hepatit\* OR hepatitis OR hepatopathy OR cirrhosis):ab,ti,kw OR 'sleep disorder'/exp OR 'insomnia'/exp OR ((sleep NEAR/3 (disorder\* OR disturbance\* OR dysfunction\*)) OR dyssomnia\* OR insomnia\* OR sleepless\*):ab,ti,kw OR 'cognitive defect'/exp OR (((cognition OR neurocognitive OR consciousness) NEXT/3 disorder\*) OR (cognitive NEXT/3 (defect\* OR deficit\* OR disab\* OR disorder\* OR dysfunction\* OR impairment\*)) OR dementia OR "executive dysfunction\*" OR amnesia OR korsakoff OR huntington OR delirium OR alzheimer OR "creutzfeldt jakob" OR "kluver bucy" OR "kluever bucy" OR "lewy body" OR "lewy bodies" OR "alcoholic psychosis" OR "toxic psychoses" OR "amyotrophic lateral sclerosis" OR "corticobasal degeneration" OR "multiple system atroph\*" OR parkinson\*):ab,ti,kw OR 'diabetes mellitus'/exp OR (diabetes OR diabetic\* OR prediabetic\* OR "glucose intolerance\*"):ab,ti,kw OR 'anxiety disorder'/exp OR (anxiety OR "acute stress disorder\*" OR "distress syndrome\*" OR "obsessive compulsive" OR panic OR phobia\* OR "phobic disorder\*" OR "posttraumatic stress" OR "post-traumatic stress" OR "neurotic disorder\*"):ab,ti,kw) AND ('epidemiology'/de OR 'epidemiology'/lnk OR 'health survey'/exp OR 'incidence'/de OR 'prevalence'/de OR 'morbidity'/de OR 'population'/exp OR 'population research'/de OR 'population risk'/de OR 'population statistics'/exp OR 'screening'/de OR 'mass screening'/de OR (epidemiol\* OR prevalen\* OR inciden\* OR morbidity OR "general population" OR "population based" OR surveillance OR cohort):ab,ti,kw OR 'cohort analysis'/de OR 'case control study'/de OR 'population based case control study'/de OR 'cross-sectional study'/de OR 'follow up'/de OR 'longitudinal study'/de OR 'retrospective study'/de OR ("case-control stud\*" OR ("cross sectional" NEXT/3 (study OR studies OR design OR research)) OR "follow-up stud\*" OR "followup stud\*" OR "longitudinal stud\*" OR "longitudinal evaluation" OR (retrospective NEXT/3 (study OR studies OR design)) OR survey OR surveys OR screening):ab,ti,kw) NOT ([conference abstract]/lim AND [<1966-2016]/py) NOT ([animals]/lim NOT [humans]/lim)

| <a href="#">24'828</a>  | références trouvées le                                                                                                                                                                                                                                             | 2 septembre 2019 |
|-------------------------|--------------------------------------------------------------------------------------------------------------------------------------------------------------------------------------------------------------------------------------------------------------------|------------------|
| <b>Commentaire(s) :</b> | Nous avons exclu les références des "conferences abstracts" avant 2017, partant du principe qu'elles ont fait l'objet d'une publication.<br><br>Limites utilisées :<br>NOT ([conference abstract]/lim AND [<1966-2016]/py)<br>NOT ([animals]/lim NOT [humans]/lim) |                  |

## Medline Ovid SP

Ovid MEDLINE(R) and Epub Ahead of Print, In-Process & Other Non-Indexed Citations and Daily 1946 to April 11, 2019

Stratégie avec syntaxe adaptée à copier/coller dans base de donnée [ici](#) (décocher case "Map Term to Subject Heading")

(exp Aged/ OR "Geriatric Nursing"/ OR "Geriatric Assessment"/ OR "Geriatrics"/ OR Geriatric Psychiatry/ OR (elder\* OR eldest OR geriatr\* OR "old aged" OR "oldest old\*" OR "very old\*" OR (older ADJ1 (patient\* OR people OR subject\* OR age\* OR adult\* OR man OR men OR male\* OR woman OR women OR female\* OR population\* OR person\*)) OR aging OR ageing).ab,ti,kf.) AND (alcoholism/ OR drinking behavior/ OR binge drinking/ OR alcohol drinking/ OR (alcohol\* OR drunk\*).ab,ti,kf. OR (drink\*.ab,ti,kf. NOT (exp "Deglutition Disorders"/ OR "Drinking"/ OR "Drinking Water" OR (deglutition-disorder\* OR dysphagia\* OR (water ADJ1 drink\*).ab,ti,kf.))) AND ("Comorbidity"/ OR (comorbid\* OR co-morbid\* OR co-occurr\* OR cooccurr\* OR ((disease\* OR sickness\*) ADJ2 associat\*).ab,ti,kf. OR exp "Hypertension"/ OR (hypertension OR "blood pressure\*" OR hypertensive).ab,ti,kf. OR exp "Mood Disorders"/ OR ("mood disorder\*" OR depression\* OR bipolar OR depressive OR dysthymia OR melancholia OR melancholy OR mourning OR ((dysthymic OR affective OR cyclothymic ADJ3 disorder\*).ab,ti,kf. OR exp "Pain"/ OR (pain OR pains OR "physical suffering\*" OR ache OR aches).ab,ti,kf. OR exp "Liver Diseases"/ OR (liver OR hepatic OR hepatit\* OR hepatitis OR hepatopathy OR cirrhosis).ab,ti,kf. OR exp "Sleep Wake Disorders"/ OR ((sleep ADJ3 (disorder\* OR disturbance\* OR dysfunction\*)) OR dyssomnia\* OR insomnia\* OR sleepless\*).ab,ti,kf. OR exp "Cognition Disorders"/ OR "Cognitive Dysfunction"/ OR exp "Dementia"/ OR (((cognition OR neurocognitive OR consciousness) ADJ3 disorder\*) OR (cognitive ADJ3 (defect\* OR deficit\* OR disab\* OR disorder\* OR dysfunction\* OR impairment\*)) OR dementia OR "executive dysfunction\*" OR amnesia OR korsakoff OR huntington OR delirium OR alzheimer OR "creutzfeldt jakob" OR "kluver bucy" OR "kluever bucy" OR "lewy body" OR "lewy bodies" OR "alcoholic psychosis" OR "toxic psychoses" OR "amyotrophic lateral sclerosis" OR "corticobasal degeneration" OR "multiple system atroph\*" OR parkinson\*).ab,ti,kf. OR exp "Diabetes Mellitus"/ OR (diabetes OR diabetic\* OR prediabetic\* OR "glucose intolerance\*).ab,ti,kf. OR exp "Anxiety Disorders"/ OR (anxiety OR "acute stress disorder\*" OR "distress syndrome\*" OR "obsessive compulsive" OR panic OR phobia\* OR "phobic disorder\*" OR "posttraumatic stress" OR "post-traumatic stress" OR "neurotic disorder\*).ab,ti,kf.) AND ("Epidemiology"/ OR exp "Epidemiologic Methods"/ OR "epidemiology".fs. OR "Incidence"/ OR "Prevalence"/ OR "Morbidity"/ OR "Health Surveys"/ OR exp "Population Surveillance"/ OR "Epidemiologic Measurements"/ OR exp "Population"/ OR exp "Epidemiologic Methods"/ OR "Mass Screening"/ OR (epidemiol\* OR prevalen\* OR inciden\* OR morbidity OR "general population" OR "population based" OR surveillance OR cohort).ab,ti,kf. OR exp "Epidemiologic Studies"/ OR ("case-control stud\*" OR ("cross sectional" ADJ3 (study OR studies OR design OR research)) OR "follow-up stud\*" OR "followup stud\*" OR "longitudinal stud\*" OR "longitudinal evaluation" OR (retrospective ADJ3 (study OR studies OR design)) OR survey OR surveys OR screening).ab,ti,kf.) NOT (animals NOT humans).sh.

|                         |                                                   |                         |
|-------------------------|---------------------------------------------------|-------------------------|
| <b>22'765</b>           | <b>références trouvées le</b>                     | <b>2 septembre 2019</b> |
| <b>Commentaire(s) :</b> | Limite utilisée :<br>NOT (animals NOT humans).sh. |                         |

## PubMed

Stratégie avec syntaxe adaptée à copier/coller dans base de donnée [ici](#)

(elder\*[tiab] OR eldest[tiab] OR geriatr\*[tiab] OR "old aged"[tiab] OR "oldest old\*" [tiab] OR "very old\*" [tiab] OR older patient\*[tiab] OR "older people"[tiab] OR older subject\*[tiab] OR older age\*[tiab] OR older adult\*[tiab] OR "older man"[tiab] OR "older men"[tiab] OR older male\*[tiab] OR "older woman"[tiab] OR "older women"[tiab] OR older female\*[tiab] OR older population\*[tiab] OR older person\*[tiab] OR aging[tiab] OR ageing[tiab]) AND (alcohol\*[tiab] OR drunk\*[tiab] OR (drink\*[tiab] NOT (deglutition-disorder\*[tiab] OR dysphagia\*[tiab] OR water drink\*[tiab]))) AND (comorbid\*[tiab] OR co-morbid\*[tiab] OR co-occurr\*[tiab] OR cooccurr\*[tiab] OR ((disease\*[tiab] OR sickness\*[tiab]) AND associat\*[tiab]) OR hypertension[tiab] OR blood pressure\*[tiab] OR



hypertensive[tiab] OR mood disorder\*[tiab] OR depression\*[tiab] OR bipolar[tiab] OR depressive[tiab] OR dysthymia[tiab] OR melancholia[tiab] OR melancholy[tiab] OR mourning[tiab] OR ((dysthymic[tiab] OR affective[tiab] OR cyclothymic[tiab]) AND disorder\*[tiab]) OR pain[tiab] OR pains[tiab] OR physical suffering\*[tiab] OR ache[tiab] OR aches[tiab] OR liver[tiab] OR hepatic[tiab] OR hepatit\*[tiab] OR hepatitis[tiab] OR hepatopathy[tiab] OR cirrhosis[tiab] OR (sleep[tiab] AND (disorder\*[tiab] OR disturbance\*[tiab] OR dysfunction\*[tiab])) OR dyssomnia\*[tiab] OR insomnia\*[tiab] OR sleepless\*[tiab] OR ((cognition[tiab] OR neurocognitive[tiab] OR consciousness[tiab]) AND disorder\*[tiab]) OR (cognitive[tiab] AND (defect\*[tiab] OR deficit\*[tiab] OR disab\*[tiab] OR disorder\*[tiab] OR dysfunction\*[tiab] OR impairment\*[tiab])) OR dementia[tiab] OR executive dysfunction\*[tiab] OR amnesia[tiab] OR korsakoff[tiab] OR huntington[tiab] OR delirium[tiab] OR alzheimer[tiab] OR "creutzfeldt jakob"[tiab] OR "kluver bucy"[tiab] OR "kluever bucy"[tiab] OR "lewy body"[tiab] OR "lewy bodies"[tiab] OR "alcoholic psychosis"[tiab] OR "toxic psychoses"[tiab] OR "amyotrophic lateral sclerosis"[tiab] OR "corticobasal degeneration"[tiab] OR multiple system atroph\*[tiab] OR parkinson\*[tiab] OR diabetes[tiab] OR diabetic\*[tiab] OR prediabetic\*[tiab] OR glucose intolerance\*[tiab] OR anxiety[tiab] OR acute stress disorder\*[tiab] OR distress syndrome\*[tiab] OR "obsessive compulsive"[tiab] OR panic[tiab] OR phobia\*[tiab] OR phobic disorder\*[tiab] OR "posttraumatic stress"[tiab] OR "post-traumatic stress"[tiab] OR neurotic disorder\*[tiab]) AND (epidemiol\*[tiab] OR prevalen\*[tiab] OR inciden\*[tiab] OR morbidity[tiab] OR "general population"[tiab] OR "population based"[tiab] OR surveillance[tiab] OR cohort[tiab] OR case-control stud\*[tiab] OR ("cross sectional" AND (study[tiab] OR studies[tiab] OR design[tiab] OR research[tiab])) OR follow-up stud\*[tiab] OR followup stud\*[tiab] OR longitudinal stud\*[tiab] OR "longitudinal evaluation"[tiab] OR (retrospective[tiab] AND (study[tiab] OR studies[tiab] OR design[tiab])) OR survey[tiab] OR surveys[tiab] OR screening[tiab]) NOT medline[*sb*]

|                         |                                                                                          |                         |
|-------------------------|------------------------------------------------------------------------------------------|-------------------------|
| <b>692</b>              | <b>références trouvées le</b>                                                            | <b>2 septembre 2019</b> |
| <b>Commentaire(s) :</b> | Recherche limitée aux références non indexées pour Medline :<br>NOT medline[ <i>sb</i> ] |                         |

## CINAHL EBSCO

Stratégie avec syntaxe adaptée à copier/coller dans base de donnée [ici](#)

(MH "Aged" OR MH "Aged, 80 and Over" OR MH "Frail Elderly" OR MH "Gerontologic Nursing+" OR MH "Geriatric Assessment+" OR MH "Geriatrics" OR MH "Geriatric Psychiatry" OR TI (elder\* OR eldest OR geriatr\* OR "old aged" OR "oldest old\*" OR "very old\*" OR (older W1 (patient\* OR people OR subject\* OR age\* OR adult\* OR man OR men OR male\* OR woman OR women OR female\* OR population\* OR person\*)) OR aging OR ageing) OR AB (elder\* OR eldest OR geriatr\* OR "old aged" OR "oldest old\*" OR "very old\*" OR (older W1 (patient\* OR people OR subject\* OR age\* OR adult\* OR man OR men OR male\* OR woman OR women OR female\* OR population\* OR person\*)) OR aging OR ageing)) AND (MH "Alcoholism" OR MH "Alcohol Abuse+" OR MH "Drinking Behavior+" OR MH "Alcohol Drinking" OR MH "Binge Drinking" OR TI (alcohol\* OR drunk\*) OR (TI (drink\*) NOT (MH "Deglutition Disorders" OR MH "Water Supply" OR MH "Fluid Intake" OR TI (deglutition-disorder\* OR dysphagia\* OR (water N1 drink\*)))) OR AB (alcohol\* OR drunk\*) OR (AB (drink\*) NOT (MH "Deglutition Disorders" OR MH "Water Supply" OR MH "Fluid Intake" OR AB (deglutition-disorder\* OR dysphagia\* OR (water N1 drink\*)))) AND (MH "Comorbidity" OR TI (comorbid\* OR co-morbid\* OR co-occurr\* OR cooccurr\* OR ((disease\* OR sickness\*) N1 associat\*)) OR AB (comorbid\* OR co-morbid\* OR co-occurr\* OR cooccurr\* OR ((disease\* OR sickness\*) N1 associat\*)) OR MH "Hypertension+" OR TI (hypertension OR "blood pressure\*" OR hypertensive) OR AB (hypertension OR "blood pressure\*" OR hypertensive) OR MH "Affective Disorders+" OR TI ("mood disorder\*" OR depression\* OR bipolar OR depressive OR dysthymia OR melancholia OR melancholy OR mourning OR ((dysthymic OR affective OR cyclothymic) W2 disorder\*)) OR AB ("mood disorder\*" OR depression\* OR bipolar OR depressive OR dysthymia OR melancholia OR melancholy OR mourning OR ((dysthymic OR affective OR cyclothymic) W2 disorder\*)) OR MH "Pain+" OR TI (pain OR pains OR "physical suffering\*" OR ache OR aches) OR AB (pain OR pains OR "physical suffering\*" OR ache OR aches) OR MH "Liver Diseases+" OR TI (liver OR hepatic OR hepatit\* OR hepatitis OR hepatopathy OR cirrhosis) OR AB (liver OR hepatic OR hepatit\* OR hepatitis OR hepatopathy OR cirrhosis) OR MH "Sleep Disorders+" OR TI ((sleep N2 (disorder\* OR disturbance\* OR dysfunction\*)) OR dyssomnia\* OR insomnia\* OR sleepless\*) OR AB ((sleep N2 (disorder\* OR disturbance\* OR dysfunction\*)) OR dyssomnia\* OR insomnia\* OR sleepless\*) OR MH "Cognition Disorders+" OR MH "Dementia+"

OR TI (((cognition OR neurocognitive OR consciousness) W2 disorder\*) OR (cognitive W2 (defect\* OR deficit\* OR disab\* OR disorder\* OR dysfunction\* OR impairment\*)) OR dementia OR "executive dysfunction\*" OR amnesia OR korsakoff OR huntington OR delirium OR alzheimer OR "creutzfeldt jakob" OR "kluver bucy" OR "kluever bucy" OR "lewy body" OR "lewy bodies" OR "alcoholic psychosis" OR "toxic psychoses" OR "amyotrophic lateral sclerosis" OR "corticobasal degeneration" OR "multiple system atroph\*" OR parkinson\*) OR AB (((cognition OR neurocognitive OR consciousness) W2 disorder\*) OR (cognitive W2 (defect\* OR deficit\* OR disab\* OR disorder\* OR dysfunction\* OR impairment\*)) OR dementia OR "executive dysfunction\*" OR amnesia OR korsakoff OR huntington OR delirium OR alzheimer OR "creutzfeldt jakob" OR "kluver bucy" OR "kluever bucy" OR "lewy body" OR "lewy bodies" OR "alcoholic psychosis" OR "toxic psychoses" OR "amyotrophic lateral sclerosis" OR "corticobasal degeneration" OR "multiple system atroph\*" OR parkinson\*) OR MH "Diabetes Mellitus+" OR TI (diabetes OR diabetic\* OR prediabetic\* OR "glucose intolerance\*") OR AB (diabetes OR diabetic\* OR prediabetic\* OR "glucose intolerance\*") OR MH "Anxiety Disorders+" OR TI (anxiety OR "acute stress disorder\*" OR "distress syndrome\*" OR "obsessive compulsive" OR panic OR phobia\* OR "phobic disorder\*" OR "posttraumatic stress" OR "post-traumatic stress" OR "neurotic disorder\*") OR AB (anxiety OR "acute stress disorder\*" OR "distress syndrome\*" OR "obsessive compulsive" OR panic OR phobia\* OR "phobic disorder\*" OR "posttraumatic stress" OR "post-traumatic stress" OR "neurotic disorder\*") AND (MH "Epidemiology+" OR MW epidemiology OR MH "Incidence" OR MH "Prevalence" OR MH "Morbidity" OR MH "Epidemiological Research" OR MH "Population" OR MH "Rural Population" OR MH "Suburban Population" OR MH "Urban Population" OR MH "Health Screening" OR TI (epidemiol\* OR prevalen\* OR inciden\* OR morbidity OR "general population" OR "population based" OR surveillance OR cohort) OR AB (epidemiol\* OR prevalen\* OR inciden\* OR morbidity OR "general population" OR "population based" OR surveillance OR cohort) OR MH "Prospective Studies+" OR MH "Case Control Studies" OR MH "Population-Based Case Control" OR MH "Cross Sectional Studies" OR TI ("case-control stud\*" OR ("cross sectional" W2 (study OR studies OR design OR research)) OR "follow-up stud\*" OR "followup stud\*" OR "longitudinal stud\*" OR "longitudinal evaluation" OR (retrospective W2 (study OR studies OR design)) OR survey OR surveys OR screening) OR AB ("case-control stud\*" OR ("cross sectional" W2 (study OR studies OR design OR research)) OR "follow-up stud\*" OR "followup stud\*" OR "longitudinal stud\*" OR "longitudinal evaluation" OR (retrospective W4 (study OR studies OR design)) OR survey OR surveys OR screening) NOT (MH "Animals" NOT MH "humans")

|                      |                        |                  |
|----------------------|------------------------|------------------|
| <a href="#">5624</a> | références trouvées le | 2 septembre 2019 |
| Commentaire(s) :     |                        |                  |

## PsycINFO Ovid SP

PsycINFO 1806 to April Week 2 2019

Stratégie avec syntaxe adaptée à copier/coller dans base de donnée [ici](#) (décocher case "Map Term to Subject Heading")

(geriatrics/ OR geriatric assessment/ OR geriatric patients/ OR geriatric psychiatry/ OR elder care/ OR aging in place/ OR (elder\* OR eldest OR geriatr\* OR "old aged" OR "oldest old\*" OR "very old\*" OR (older ADJ1 (patient\* OR people OR subject\* OR age\* OR adult\* OR man OR men OR male\* OR woman OR women OR female\* OR population\* OR person\*)) OR aging OR ageing).ab,ti.) AND (exp alcohol abuse/ OR drinking behavior/ OR alcohol drinking patterns/ OR (alcohol\* OR drunk\*).ab,ti. OR (drink\*.ab,ti. NOT (dysphagia/ OR exp fluid intake/ OR (deglutition-disorder\* OR dysphagia\* OR (water ADJ1 drink\*).ab,ti.))) AND (comorbidity/ OR (comorbid\* OR comorbid\* OR co-occurr\* OR cooccurr\* OR ((disease\* OR sickness\*) ADJ2 associat\*).ab,ti. OR exp hypertension/ OR (hypertension OR "blood pressure\*" OR hypertensive).ab,ti. OR exp affective disorders/ OR ("mood disorder\*" OR depression\* OR bipolar OR depressive OR dysthymia OR melancholia OR melancholy OR mourning OR ((dysthymic OR affective OR cyclothymic) ADJ3 disorder\*).ab,ti. OR exp pain/ OR pain measurement/ OR (pain OR pains OR "physical suffering\*" OR ache OR aches).ab,ti. OR exp liver disorders/ OR (liver OR hepatic OR hepatit\* OR hepatitis OR hepatopathy OR cirrhosis).ab,ti. OR exp sleep disorders/ OR ((sleep ADJ3 (disorder\* OR disturbance\* OR dysfunction\*)) OR dyssomnia\* OR insomnia\* OR sleepless\*).ab,ti. OR cognitive impairment/ OR exp dementia/ OR (((cognition OR neurocognitive OR consciousness) ADJ3 disorder\*) OR (cognitive ADJ3 (defect\* OR deficit\* OR disab\* OR disorder\* OR dysfunction\* OR impairment\*)) OR dementia OR "executive dysfunction\*" OR amnesia OR korsakoff OR huntington OR delirium OR alzheimer OR "creutzfeldt jakob" OR

"klüber bucy" OR "kluever bucy" OR "lewy body" OR "lewy bodies" OR "alcoholic psychosis" OR "toxic psychoses" OR "amyotrophic lateral sclerosis" OR "corticobasal degeneration" OR "multiple system atroph\*" OR parkinson\*).ab,ti. OR exp diabetes mellitus/ OR (diabetes OR diabetic\* OR prediabetic\* OR "glucose intolerance\*").ab,ti. OR exp anxiety disorders/ OR (anxiety OR "acute stress disorder\*" OR "distress syndrome\*" OR "obsessive compulsive" OR panic OR phobia\* OR "phobic disorder\*" OR "posttraumatic stress" OR "post-traumatic stress" OR "neurotic disorder\*").ab,ti.) AND (epidemiology/ OR morbidity/ OR exp population/ OR screening/ OR health screening/ OR (epidemiol\* OR prevalen\* OR inciden\* OR morbidity OR "general population" OR "population based" OR surveillance OR cohort).ab,ti. OR cohort analysis/ OR followup studies/ OR exp longitudinal studies/ OR retrospective studies/ OR ("case-control stud\*" OR ("cross sectional" ADJ3 (study OR studies OR design OR research)) OR "follow-up stud\*" OR "followup stud\*" OR "longitudinal stud\*" OR "longitudinal evaluation" OR (retrospective ADJ3 (study OR studies OR design)) OR survey OR surveys OR screening).ab,ti.)

|                         |                                                  |                         |
|-------------------------|--------------------------------------------------|-------------------------|
| <b>1380</b>             | <b>références trouvées le</b>                    | <b>2 septembre 2019</b> |
| <b>Commentaire(s) :</b> | Dans PsycInfo, "limit humans" ne fonctionne pas. |                         |

### Central - Cochrane Library Wiley

Cochrane Central Register of Controlled Trials

Issue 4 of 12, April 2019

Stratégie avec syntaxe adaptée à copier/coller dans base de donnée [ici](#) (puis sélectionner « Trials » sous « All Results »)

(elder\* OR eldest OR geriatr\* OR "old aged" OR "oldest old\*" OR "very old\*" OR (older NEXT/1 (patient\* OR people OR subject\* OR age\* OR adult\* OR man OR men OR male\* OR woman OR women OR female\* OR population\* OR person\*)) OR aging OR ageing):kw,ti,ab AND ((alcohol\* OR drunk\*):kw,ti,ab OR (drink\*:kw,ti,ab NOT (deglutition-disorder\* OR dysphagia\* OR (water NEAR/1 drink\*)):kw,ti,ab)) AND ((comorbid\* OR comorbid\* OR co-occurr\* OR cooccurr\* OR ((disease\* OR sickness\*) NEAR/2 associat\*)):kw,ti,ab OR (hypertension OR "blood pressure\*" OR hypertensive):kw,ti,ab OR ("mood disorder\*" OR depression\* OR bipolar OR depressive OR dysthymia OR melancholia OR melancholy OR mourning OR ((dysthymic OR affective OR cyclothymic) NEXT/3 disorder\*)):kw,ti,ab OR (pain OR pains OR "physical suffering\*" OR ache OR aches):kw,ti,ab OR (liver OR hepatic OR hepatit\* OR hepatitis OR hepatopathy OR cirrhosis):kw,ti,ab OR ((sleep NEAR/3 (disorder\* OR disturbance\* OR dysfunction\*)) OR dyssomnia\* OR insomnia\* OR sleepless\*):kw,ti,ab OR (((cognition OR neurocognitive OR consciousness) NEXT/3 disorder\*) OR (cognitive NEXT/3 (defect\* OR deficit\* OR disab\* OR disorder\* OR dysfunction\* OR impairment\*)) OR dementia OR "executive dysfunction\*" OR amnesia OR korsakoff OR huntington OR delirium OR alzheimer OR "creutzfeldt jakob" OR "klüber bucy" OR "kluever bucy" OR "lewy body" OR "lewy bodies" OR "alcoholic psychosis" OR "toxic psychoses" OR "amyotrophic lateral sclerosis" OR "corticobasal degeneration" OR "multiple system atroph\*" OR parkinson\*):kw,ti,ab OR (diabetes OR diabetic\* OR prediabetic\* OR "glucose intolerance\*"):kw,ti,ab OR (anxiety OR "acute stress disorder\*" OR "distress syndrome\*" OR "obsessive compulsive" OR panic OR phobia\* OR "phobic disorder\*" OR "posttraumatic stress" OR "post-traumatic stress" OR "neurotic disorder\*"):kw,ti,ab) AND ((epidemiol\* OR prevalen\* OR inciden\* OR morbidity OR "general population" OR "population based" OR surveillance OR cohort):kw,ti,ab OR ("case-control stud\*" OR ("cross sectional" NEXT/3 (study OR studies OR design OR research)) OR "follow-up stud\*" OR "followup stud\*" OR "longitudinal stud\*" OR "longitudinal evaluation" OR (retrospective NEXT/3 (study OR studies OR design)) OR survey OR surveys OR screening):kw,ti,ab)

|                         |                               |                         |
|-------------------------|-------------------------------|-------------------------|
| <b>413</b>              | <b>références trouvées le</b> | <b>2 septembre 2019</b> |
| <b>Commentaire(s) :</b> |                               |                         |

## Web of Science – Core collection

Stratégie avec syntaxe adaptée à copier/coller dans base de donnée [ici](#)

TS=(elder\* OR "eldest" OR geriatr\* OR "old aged" OR "oldest old\*" OR "very old\*" OR ("older" NEAR/1 (patient\* OR "people" OR subject\* OR age\* OR adult\* OR "man" OR "men" OR male\* OR "woman" OR "women" OR female\* OR population\* OR person\*)) OR "aging" OR "ageing") AND (TS=(alcohol\* OR drunk\*) OR (TS=(drink\*) NOT TS=(deglutition-disorder\* OR dysphagia\* OR ("water" NEAR/1 drink\*))) AND (TS=(comorbid\* OR comorbid\* OR co-occurr\* OR cooccurr\* OR ((disease\* OR sickness\*) NEAR/1 associat\*)) OR TS=("hypertension" OR "blood pressure\*" OR "hypertensive") OR TS=("mood disorder\*" OR depression\* OR "bipolar" OR "depressive" OR "dysthymia" OR "melancholia" OR "melancholy" OR "mourning" OR ("dysthymic" OR "affective" OR "cyclothymic") NEAR/2 disorder\*)) OR TS=("pain" OR "pains" OR "physical suffering\*" OR "ache" OR "aches") OR TS=("liver" OR "hepatic" OR hepatit\* OR "hepatis" OR "hepatopathy" OR "cirrhosis") OR TS=(("sleep" NEAR/2 (disorder\* OR disturbance\* OR dysfunction\*)) OR dyssomnia\* OR insomnia\* OR sleepless\*) OR TS=(("cognition" OR "neurocognitive" OR "consciousness") NEAR/2 disorder\*) OR ("cognitive" NEAR/2 (defect\* OR deficit\* OR disab\* OR disorder\* OR dysfunction\* OR impairment\*)) OR "dementia" OR "executive dysfunction\*" OR "amnesia" OR korsakoff OR huntington OR delirium OR alzheimer OR "creutzfeldt jakob" OR "kluver bucy" OR "kluever bucy" OR "lewy body" OR "lewy bodies" OR "alcoholic psychosis" OR "toxic psychoses" OR "amyotrophic lateral sclerosis" OR "corticobasal degeneration" OR "multiple system atroph\*" OR parkinson\*) OR TS=("diabetes" OR diabetic\* OR prediabetic\* OR "glucose intolerance\*") OR TS=("anxiety" OR "acute stress disorder\*" OR "distress syndrome\*" OR "obsessive compulsive" OR "panic" OR phobia\* OR "phobic disorder\*" OR "posttraumatic stress" OR "post-traumatic stress" OR "neurotic disorder\*")) AND (TS=(epidemiol\* OR prevalen\* OR inciden\* OR "morbidity" OR "general population" OR "population based" OR "surveillance" OR "cohort") OR TS=("case-control stud\*" OR ("cross sectional" NEAR/2 ("study" OR "studies" OR "design" OR "research")) OR "follow-up stud\*" OR "followup stud\*" OR "longitudinal stud\*" OR "longitudinal evaluation" OR "retrospective" NEAR/2 ("study" OR "studies" OR "design")) OR "survey" OR "surveys" OR "screening"))

|                      |                        |                  |
|----------------------|------------------------|------------------|
| <a href="#">5623</a> | références trouvées le | 2 septembre 2019 |
| Commentaire(s) :     |                        |                  |

## 6. Résultats

L'ordre d'importation dans Endnote suit l'ordre ci-après :

| Base de données                  | Date de la recherche | Nombre de références... |                          |
|----------------------------------|----------------------|-------------------------|--------------------------|
|                                  |                      | ...trouvées...          | ...et après dédoublement |
| Medline OVID SP                  | 02.09.19             | 22'765                  | 22'760                   |
| Embase.com                       | 02.09.19             | 24'828                  | 11'186                   |
| PubMed                           | 02.09.19             | 692                     | 98                       |
| CINAHL EBSCO                     | 02.09.19             | 5'624                   | 843                      |
| PsycINFO OVID SP                 | 02.09.19             | 1'380                   | 296                      |
| Central – Cochrane Library Wiley | 02.09.19             | 413                     | 174                      |
| Web of Science – Core collection | 02.09.19             | 5'623                   | 1'119                    |
| <b>Total</b>                     |                      | <b>61'325</b>           | <b>36'476</b>            |
