# Supplementary material for: Epidemiology of at-risk alcohol use and associated comorbidities of interest among community-dwelling older adults: a protocol for a systematic review
Source: PubMed Central journal article supplement — BMJ Open. 2020 Jan 9;10(1):e035481. doi: 10.1136/bmjopen-2019-035481 (PMC6955484; doi:10.1136/bmjopen-2019-035481), 2020-01-09
Supplement: bmjopen-2019-035481supp003.pdf [file bmjopen-2019-035481supp003.pdf]

## Suppl. 3

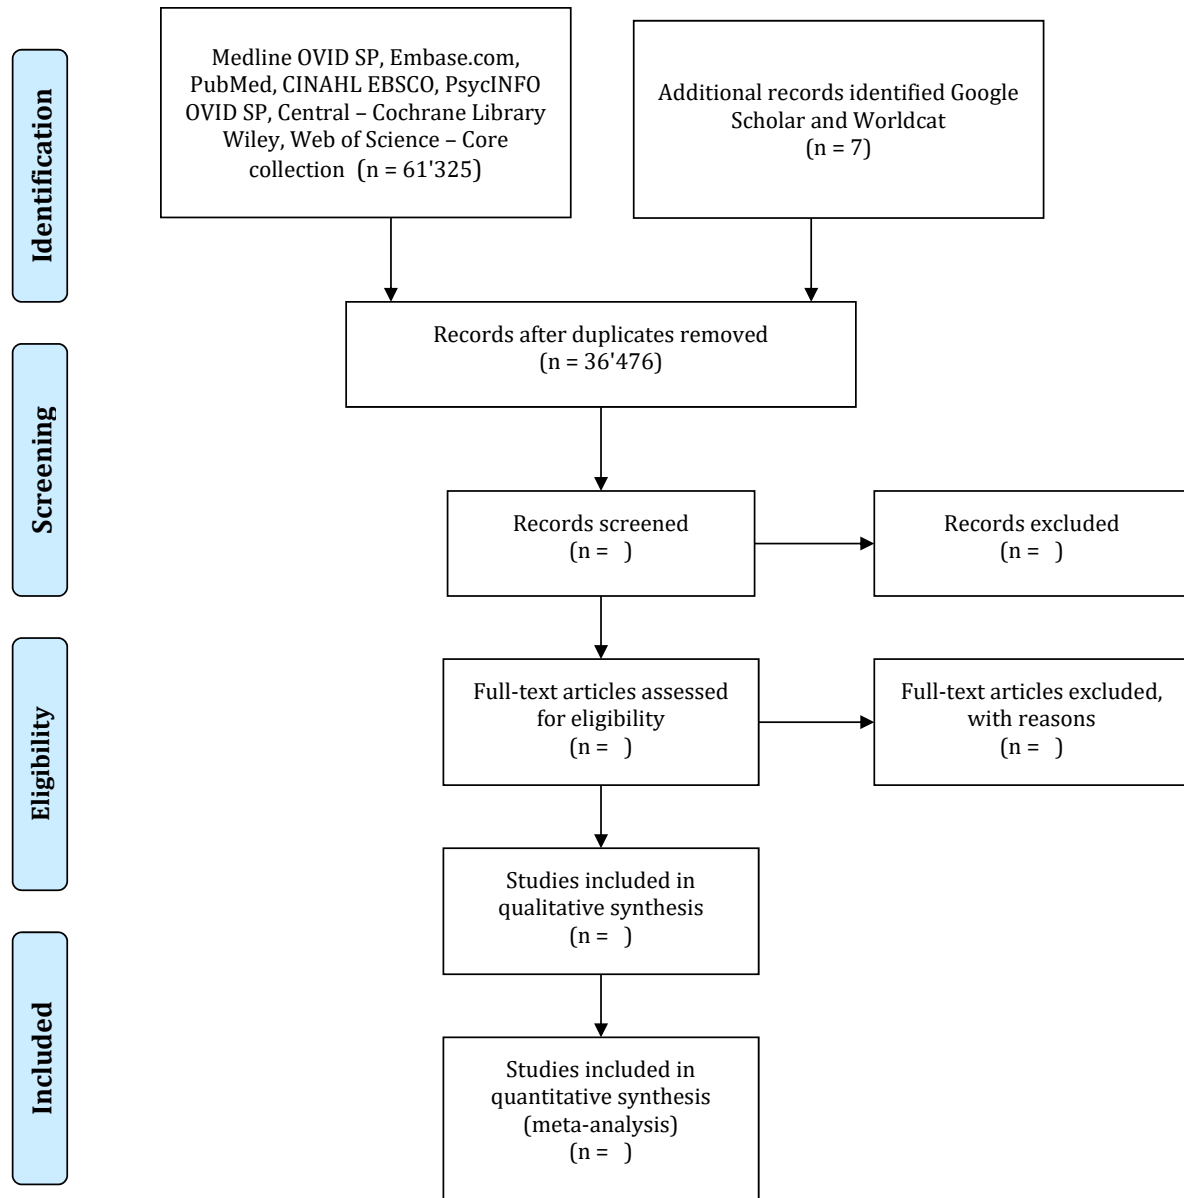

Source: Moher D, Liberati A, Tetzlaff J, Altman DG, The PRISMA Group (2009). Preferred Reporting Items for Systematic Reviews and Meta-Analyses: The PRISMA Statement. PLoS Med 6(6): e1000097. doi:10.1371/journal.pmed1000097
